# Supplementary material for: Carbonic anhydrase 9 expression is associated with poor prognosis, tumor proliferation, and radiosensitivity of thymic carcinomas
Source: PubMed Central journal article supplement (PMC6407679; doi:10.18632/oncotarget.26657), 2019-02-12
Supplement: oncotarget-10-1306-s001.pdf [file oncotarget-10-1306-s001.pdf]

# Carbonic anhydrase 9 expression is associated with poor prognosis, tumor proliferation, and radiosensitivity of thymic carcinomas

## SUPPLEMENTARY MATERIALS

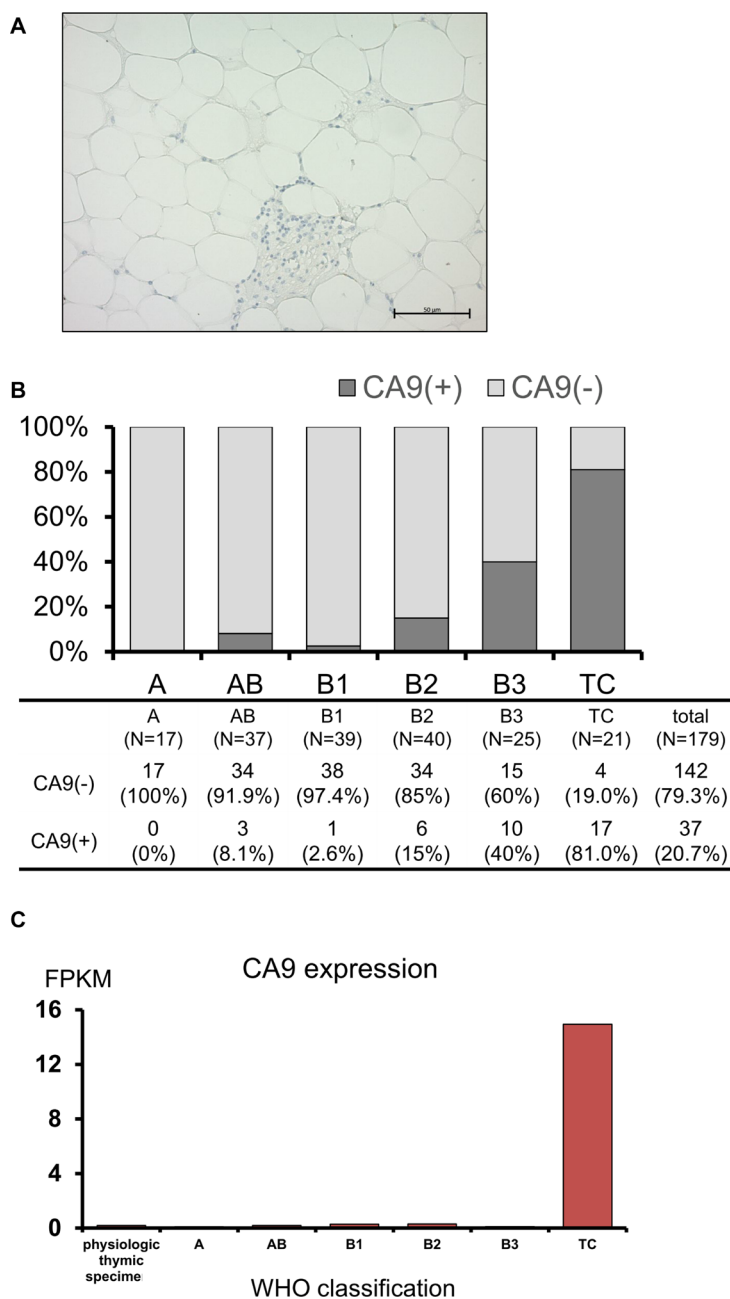

**Supplementary Figure 1:** (A) Immunohistochemical analysis of CA9 expression in physiologic thymic specimens. CA9 was not detected. (B), CA9 expression and histological subtypes of TETs. The rates of tumors positive for CA9 expression increased with an increase of the histology determined malignancy grades of TETs. (C), The average values of *CA9* mRNA expression according to histological subtypes in TETs. *CA9* mRNA expression determined using NGS significantly correlated with histology. FPKM, Fragments Per Kilobase of exon per Million mapped fragments.

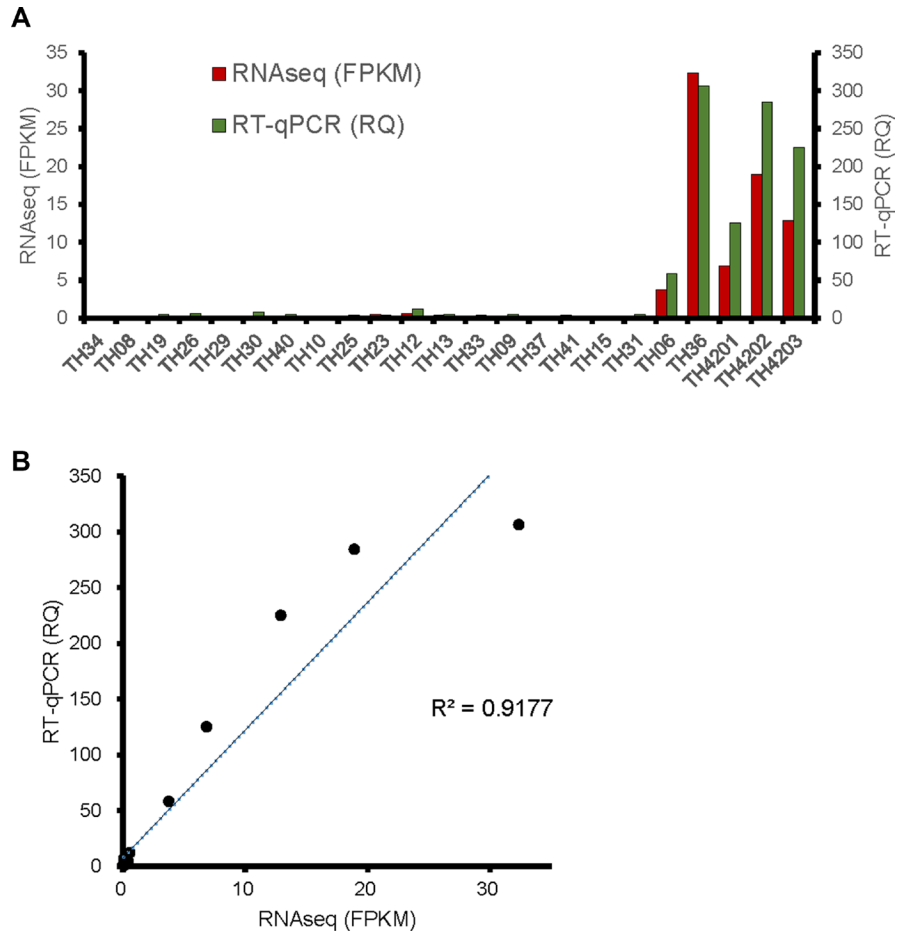

**Supplementary Figure 2: Correlation between RNAseq data and RT-qPCR data.** (A), High *C49* expression was observed only in TC samples both in RNAseq and RT-qPCR. RQ value was standardized to TH34. (RQ value of TH34 was set as 1) (B), The expression values strongly correlated with each other.
